# Supplementary material
Source: PubMed Central journal article supplement (PMC6161764)

**Reduced intensity conditioning for hematopoietic cell transplant for HLH and primary immune deficiencies: BMT CTN 1204**

***Supplemental Materials***

**Supplemental Table 1. Inclusion criteria**

**Supplemental Table 2. Last available chimerism data and DLI dosing information before reported DLI**

**Supplemental Table 3. Immune reconstitution**

*Supplemental Table 2A. Immunoglobulins*

*Supplemental Table 2B. NK cell function*

**Supplemental Figure 1. Cumulative Incidence of GVHD**

*Figure 1A. Acute GVHD*

*Figure 1B. Chronic GVHD*

**Appendix A. BMT-CTN#1204 *RICHI* Trial Protocol**

## Supplemental Table 1: Inclusion Criteria

1. Patient is  $\geq 4$  months and  $\leq 45$  years of age at time of enrollment.
2. Meets criteria for **one** of the following immune disorders (2A-2F) requiring HCT:
  - 2A. HLH or related disorder with indication for HCT:
    - a. Inherited gene mutation associated with HLH: *PRF1*, *UNC13D*, *MUNC18-2*, *STX11*, *RAB27A* (Griscelli syndrome, type 2), *SH2D1A* (XLP1), *XIAP* (XLP2), *LYST* (Chediak-Higashi syndrome).  
– OR –
    - b. Meets clinical criteria for HLH (Table 1.2), refractory to therapy according to HLH-94 or HLH-2004 (dexamethasone/etoposide), or recurrent episodes of hyper-inflammation.  
– OR –
    - c. Meets clinical criteria for HLH (Table 1.2), without identified gene defects, with affected sibling – OR – decreased or absent NK cell function at the last evaluation, – OR – a history of CNS inflammation as evidenced by pleocytosis in CSF or MRI evidence of hyper-inflammation in the CNS.
  - 2B. CAEBV: Patients with chronic EBV infection (CAEBV) with or without associated lymphoma (in complete remission) or active HLH. Note that this diagnosis is distinct from post-transplant lymphoproliferative disorder/ EBV-associated lymphoproliferative disease (PTLD/LPD). Patients must meet **all** of the following:
    - a. Severe progressive illness, usually with fever, lymphadenopathy and splenomegaly that either began as primary EBV infection or was associated with markedly elevated antibody titers to EBV viral capsid antibody ( $\geq 1:5120$ ) or early antigen ( $\geq 1:640$ ), or markedly elevated EBV DNA in the blood;  
– AND –
    - b. Infiltration of tissues (e.g., lymph nodes, liver, lungs, CNS, bone marrow, eye, skin) with lymphocytes;  
– AND –
    - c. Elevated EBV DNA, RNA or proteins in affected tissues;  
– AND –
    - d. The absence of HIV or post-transplant lymphoproliferative disorder.
  - 2C. Chronic granulomatous disease with indication for HCT:
    - a. Oxidative burst  $< 10\%$  normal with dihydrorhodamine (DHR) assay  
– AND –
    - b. Documented CGD mutation(s) in *gp91<sup>phox</sup>*, *p47<sup>phox</sup>*, *p67<sup>phox</sup>*, *p22<sup>phox</sup>* or *p40<sup>phox</sup>*  
– AND –
    - c. Severe disease as evidenced by **one** or more of the following:
      - i. history of one or more potentially life-threatening infections
      - ii. inflammatory bowel disease
      - iii. failure to thrive with height  $< 10\%$  for age (unless parent(s) height  $< 10\%$ )
      - iv. autoimmune complication felt to be linked to CGD
  - 2D. X-linked Hyper IgM Syndrome (HIGM1):
    - a. Decreased serum IgG (more than 2 standard deviations below normal for age)  
– AND –
    - b. Mutation in *CD40LG* – OR – family history of maternally related males with HIGM1.
  - 2E. IPEX Syndrome:
    - a. Absent FOXP3+ CD4+ T cells – OR – abnormal function of FOXP3+CD4+ T cells  
– AND –
    - b. Disease-associated mutation in *FoxP3* (bi-allelic in females) – OR – family history of maternally related males with clinical diagnosis of IPEX.
  - 2F. Severe Leukocyte Adhesion Deficiency, type I (LAD-I):
    - a. Decreased CD18 expression on neutrophils ( $< 5\%$  normal for age)  
– AND –
    - b. Mutation of *ITGB2* – OR – absence of *ITGB2* mRNA in leukocytes
3. Lansky or Karnofsky performance status  $\geq 50\%$ .
4. The patient's donor must be willing to give bone marrow stem cells and be:
  - An unaffected sibling donor who is a 6/6 match at HLA-A and -B (intermediate or higher resolution) and -DRB1 (at high resolution using DNA-based typing) OR
  - An unaffected related donor (other than sibling) who is a 7/8 or 8/8 match for HLA-A, -B, -C (at intermediate or higher resolution) and -DRB1 (at high resolution using DNA-based typing) OR
  - An unrelated donor who is a 7/8 or 8/8 match at HLA-A, -B, -C, and -DRB1 (at high resolution using DNA-based typing).
5. Patient must have adequate organ function as measured by:
  - a. Cardiac: Left ventricular ejection fraction (LVEF)  $> 40\%$ ; or LV shortening fraction (LVSF)  $> 26\%$  by echocardiogram.
  - b. Renal: Calculated or radioisotope GFR  $> 50$  mL/min/1.73m<sup>2</sup>
  - c. Hepatic: Adequate liver function: serum conjugated (direct) bilirubin  $< 2x$  upper limit of normal for age as per local laboratory (with the exceptions of isolated hyperbilirubinemia due to Gilbert's syndrome, or hyperbilirubinemia as the result of liver inflammation in the setting of persistent, active HLH); ALT and AST  $< 10x$  upper limit of normal as per local laboratory (with the exception of elevated transaminase levels as the result of liver inflammation in the setting of persistent, active HLH).
  - d. Pulmonary: Patient may not be on mechanical ventilation support or have progressive pulmonary infection at the time of transplant; Pulmonary Function Testing (PFT) with FEV1  $\geq 50\%$  of normal and DLCO corrected for Hgb  $> 50\%$  of normal. Patients unable to undergo PFTs should have stable respiratory status with SaO<sub>2</sub>  $> 90\%$  on a maximum of 2L/min supplemental oxygen.
6. Signed informed consent.

**Supplemental Table 2: Last available chimerism data and DLI dosing information before reported DLI**

| ID | Day of DLI, post-transplant | Total CD3 dose (x10 <sup>6</sup> cells/kg) | Day of Most Recent Unfractionated Sample | Unfractionated Sample, % Donor | Unfractionated type | Day of Most Recent T-cell Sample | T-cell Sample, % Donor | T-cell Sample Type |
|----|-----------------------------|--------------------------------------------|------------------------------------------|--------------------------------|---------------------|----------------------------------|------------------------|--------------------|
| 5  | 53                          | 11.5                                       | 53                                       | 26                             | Blood               | 53                               | 5                      | Blood              |
| 5  | 102                         | 12                                         | 99                                       | 9                              | Blood               | 99                               | 46                     | Blood              |
| 5  | 172                         | 189                                        | 99                                       | 9                              | Blood               | 99                               | 46                     | Blood              |
| 6  | 115                         |                                            |                                          |                                |                     | 98                               | 97                     | Blood              |
| 7  | 60                          | 67                                         | 52                                       | 55                             | Blood               |                                  |                        |                    |
| 8  | 73                          | 35                                         | 70                                       | 24                             | Blood               | 70                               | 37                     | Blood              |
| 8  | 86                          |                                            | 83                                       | 14                             | Blood               | 83                               | 27                     | Blood              |
| 10 | 90                          | 22                                         | 83                                       | 81                             | Blood               | 76                               | 63                     | Blood              |
| 10 | 115                         | 66                                         | 98                                       | 75                             | Blood               |                                  |                        |                    |
| 10 | 210                         | 20                                         | 174                                      | 38                             | Blood               | 175                              | 70                     | Blood              |
| 11 | 74                          | 1                                          | 73                                       | 28                             | Blood               | 73                               | 82                     | Blood              |
| 12 | 82                          | 74                                         | 79                                       | 25                             | Blood               |                                  |                        |                    |
| 13 | 100                         |                                            | 100                                      | 38                             | Blood               | 100                              | 88                     | Blood              |
| 15 | 126                         | 31                                         | 101                                      | 64                             | Blood               | 101                              | 57                     | Blood              |
| 16 | 123                         | 50                                         | 88                                       | 30                             | Blood               | 88                               | 14                     | Blood              |
| 22 | 138                         | 9                                          | 105                                      | 15                             | Blood               |                                  |                        |                    |
| 26 | 189                         |                                            |                                          |                                |                     | 106                              | 0                      | Blood              |
| 27 | 124                         |                                            | 89                                       | 5                              | Blood               | 89                               | 10                     | Blood              |
| 36 | 99                          | 0.3                                        | 99                                       | 84                             | Blood               |                                  |                        |                    |
| 36 | 115                         | 1.1                                        | 99                                       | 84                             | Blood               |                                  |                        |                    |
| 43 | 62                          | 100                                        |                                          |                                |                     | 50                               | 46                     | Blood              |
| 44 | 145                         |                                            | 97                                       | 82                             | Blood               | 88                               | 68                     | Blood              |
| 44 | 301                         |                                            | 287                                      | 44                             | Blood               | 287                              | 44                     | Blood              |

**Supplemental Table 3A**  
**Immune Reconstitution: QlgG, QlgA, and QlgM separately by IVIg status**

|      | Primary Disease: | HLH                |                   |                   |                    |             |                   | Other PID          |                    |                 |                     |             |                    | Total             |                   |                    |                    |                |                    |         |         |
|------|------------------|--------------------|-------------------|-------------------|--------------------|-------------|-------------------|--------------------|--------------------|-----------------|---------------------|-------------|--------------------|-------------------|-------------------|--------------------|--------------------|----------------|--------------------|---------|---------|
|      |                  | No                 |                   | Yes               |                    | No          |                   | Yes                |                    | No              |                     | Yes         |                    | No                |                   | Yes                |                    | No             |                    | Yes     |         |
|      |                  | Baseline           | Baseline          | Day 100           | Day 100            | Day 365     | Day 365           | Baseline           | Baseline           | Day 100         | Day 100             | Day 365     | Day 365            | Baseline          | Baseline          | Day 100            | Day 100            | Day 365        | Day 365            | Day 365 | Day 365 |
| QlgG | n                | 26                 | 8                 | 10                | 20                 | 1           | 25                | 8                  | 4                  | 4               | 6                   | 1           | 6                  | 34                | 12                | 14                 | 26                 | 2              | 31                 |         |         |
|      | Mean (SD)        | 655.23<br>(340.97) | 751.75<br>(451.7) | 986.7<br>(434.41) | 927.75<br>(345.65) | 403<br>(NA) | 630.4<br>(193.31) | 587.75<br>(183.22) | 482.75<br>(310.27) | 369<br>(157.24) | 1009.33<br>(678.74) | 369<br>(NA) | 621.83<br>(486.47) | 639.35<br>(309.9) | 662.08<br>(416.7) | 810.21<br>(469.27) | 946.58<br>(429.14) | 386<br>(24.04) | 628.74<br>(263.34) |         |         |
|      | Median (Range)   | 707<br>(1379)      | 748<br>(1320)     | 926.5<br>(1271)   | 957.5<br>(1235)    | 403<br>(0)  | 659<br>(768)      | 603.5<br>(564)     | 364.5<br>(682)     | 362.5<br>(323)  | 926.5<br>(1757)     | 369<br>(0)  | 496<br>(1404)      | 645.5<br>(1379)   | 483.5<br>(1320)   | 836<br>(1396)      | 957.5<br>(1757)    | 386<br>(34)    | 656<br>(1404)      |         |         |
| QlgA | n                | 24                 | 7                 | 7                 | 13                 | 1           | 15                | 8                  | 4                  | 1               | 5                   | 0           | 5                  | 32                | 11                | 8                  | 18                 | 1              | 20                 |         |         |
|      | Mean (SD)        | 49<br>(50.26)      | 54.29<br>(56.74)  | 22.71<br>(32.55)  | 23.85<br>(27.23)   | 24<br>(NA)  | 32.47<br>(20.67)  | 76.63<br>(81.86)   | 41.25<br>(32.36)   | 8<br>(NA)       | 44<br>(60.67)       | NA          | 81.6<br>(60.88)    | 55.91<br>(59.46)  | 49.55<br>(47.84)  | 20.88<br>(30.58)   | 29.44<br>(38.41)   | 24<br>(NA)     | 44.75<br>(39.64)   |         |         |
|      | Median (Range)   | 26 (202)           | 35 (136)          | 7 (91)            | 12 (90)            | 24 (0)      | 27 (64)           | 54 (201)           | 28.5 (70)          | 8 (0)           | 11 (141)            | NA          | 52 (143)           | 30 (203)          | 33 (136)          | 7.5 (91)           | 11.5 (145)         | 24 (0)         | 43.5 (181)         |         |         |
| QlgM | n                | 25                 | 7                 | 7                 | 14                 | 1           | 15                | 8                  | 4                  | 1               | 5                   | 0           | 5                  | 33                | 11                | 8                  | 19                 | 1              | 20                 |         |         |
|      | Mean (SD)        | 45<br>(41.17)      | 57.57<br>(59.92)  | 27.43<br>(26.34)  | 31.07<br>(28.17)   | 59<br>(NA)  | 54.13<br>(54.22)  | 75.38<br>(58.46)   | 43.5<br>(23.23)    | 5<br>(NA)       | 154.2<br>(267.51)   | NA          | 179.4<br>(313.71)  | 52.36<br>(46.84)  | 52.45<br>(48.65)  | 24.63<br>(25.65)   | 63.47<br>(139.92)  | 59<br>(NA)     | 85.45<br>(161.19)  |         |         |
|      | Median (Range)   | 27 (156)           | 37 (173)          | 24 (77)           | 27 (101)           | 59 (0)      | 42 (214)          | 71.5 (175)         | 37 (52)            | 5 (0)           | 26 (624)            | NA          | 31 (732)           | 32 (181)          | 37 (173)          | 18.5 (77)          | 26 (624)           | 59 (0)         | 42 (732)           |         |         |

Yes = Received IVIg at any point before the measurement at a respective visit.

**Supplemental Table 3B. NK Cell Function**

|                               | <b><u>Baseline</u></b> | <b><u>Day 100</u></b> | <b><u>Day 365</u></b> |
|-------------------------------|------------------------|-----------------------|-----------------------|
| <b>NK Cell Function</b>       | <b>n (%)*</b>          | <b>n (%)*</b>         | <b>n (%)*</b>         |
| Missing or Form Not Submitted | 5 (NA)                 | 16 (NA)               | 18 (NA)               |
| Present - Normal              | 8 (27.6)               | 13 (76.5)             | 8 (53.3)              |
| Present - Decreased           | 13 (44.8)              | 3 (17.6)              | 6 (40.0)              |
| Absent                        | 8 (27.6)               | 1 (5.9)               | 1 (6.7)               |
| Sample Uninterpretable        | 0 (NA)                 | 1 (NA)                | 1 (NA)                |
| <b>Percentage of NK Cells</b> |                        |                       |                       |
| n                             | 21                     | 16                    | 12                    |
| Mean (Std. Dev.)              | 12.79 (16.6)           | 34.5 (25.55)          | 18.08 (11.32)         |
| Median (Range)                | 6 (52)                 | 27.5 (84)             | 15.5 (34)             |

\*Percent of available samples (not missing or uninterpretable) given

**Supplemental Figure 1. GVHD**  
Figure 1A. Acute GVHD (Grades II-IV)

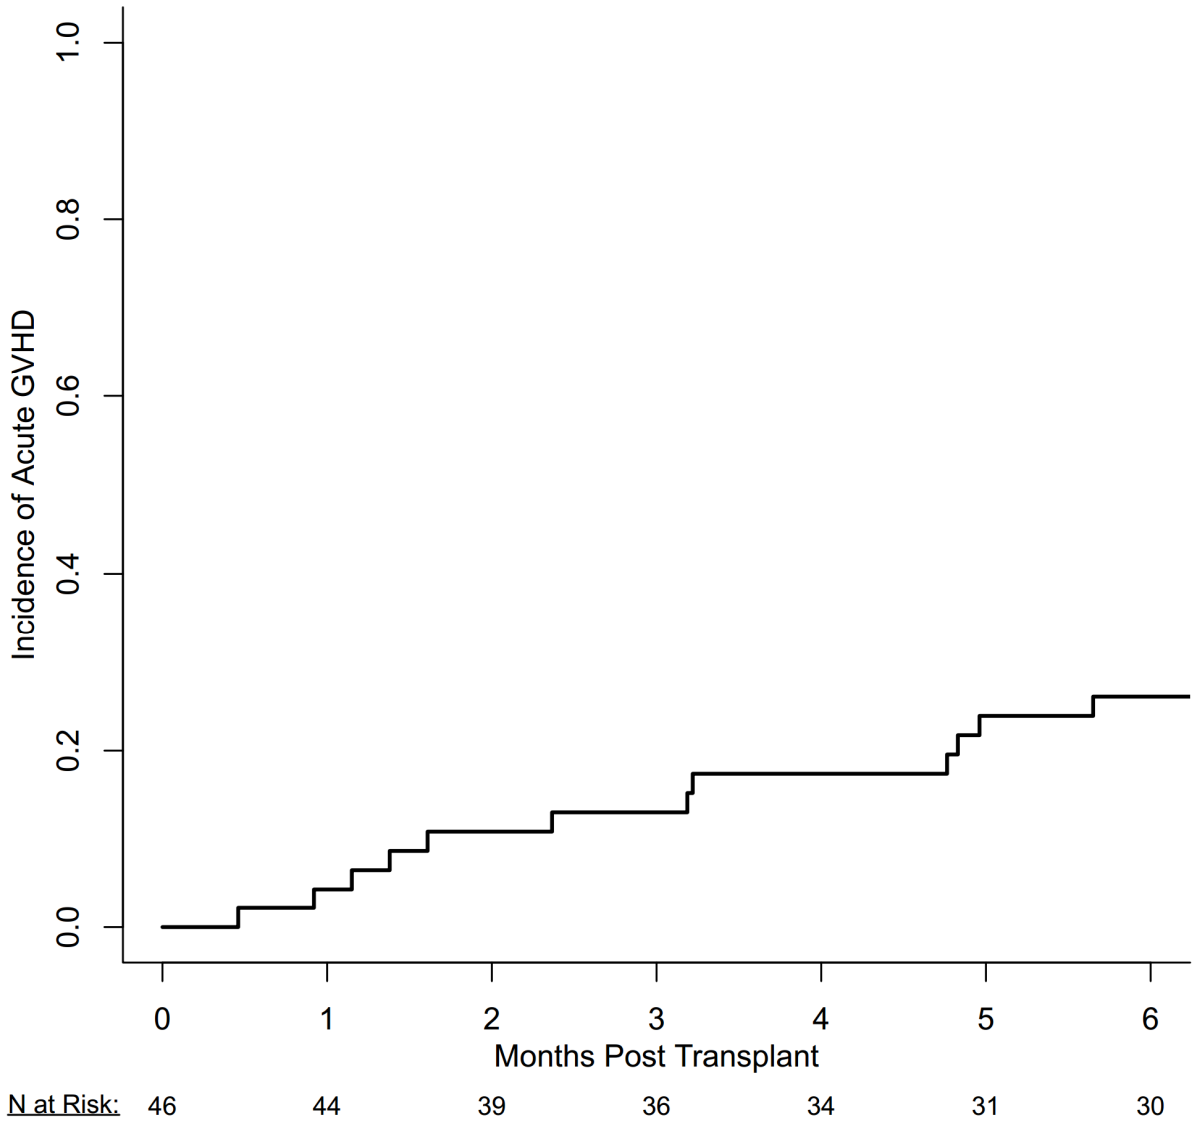

Figure 1B. Chronic GVHD

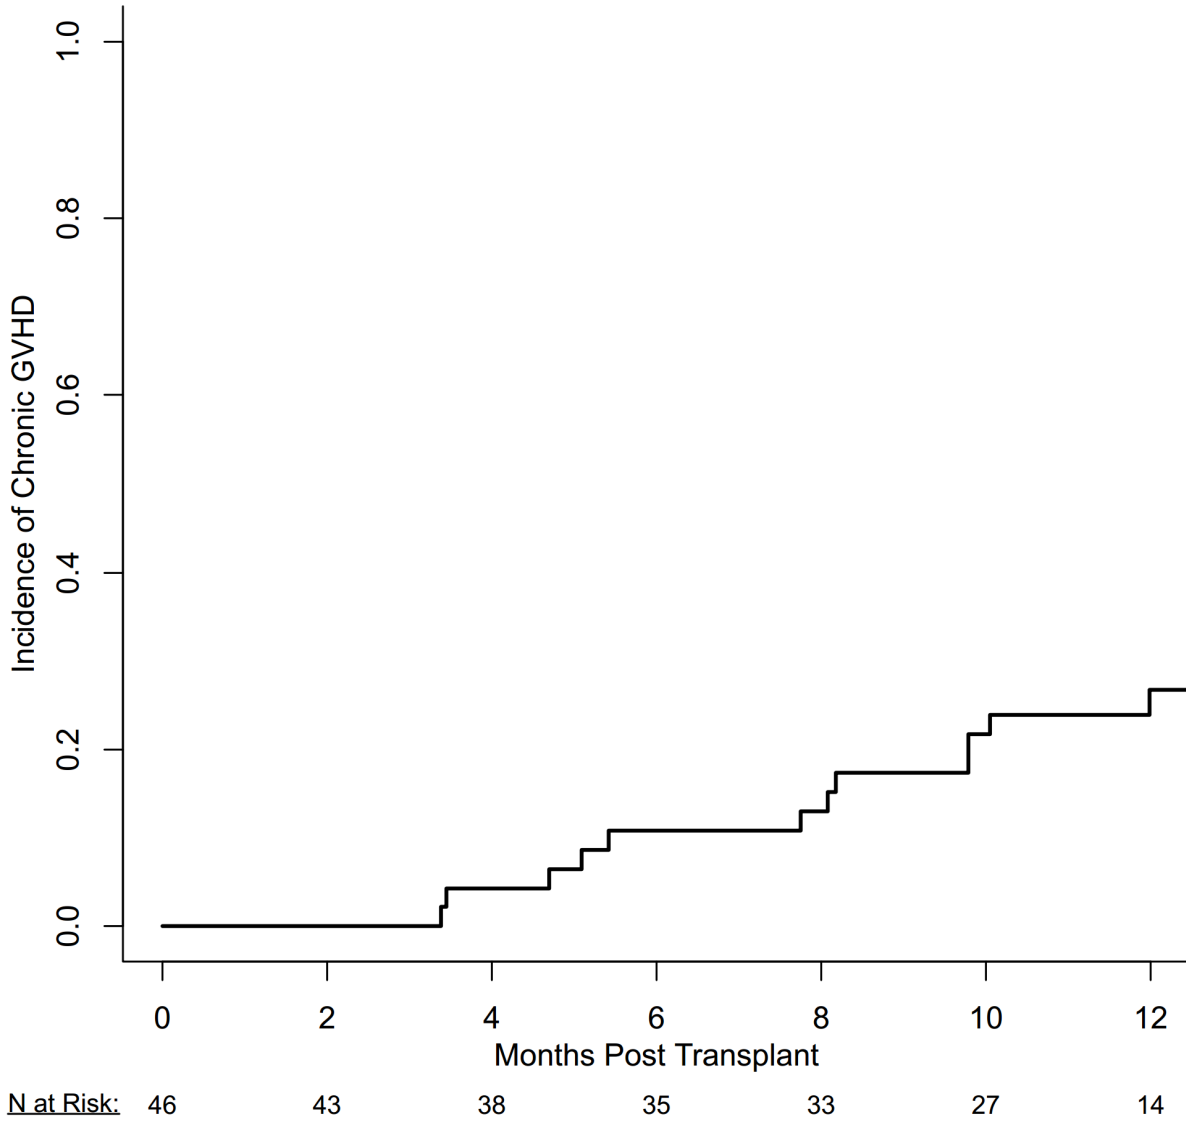

Supplement: blood828277-suppl1.pdf [file blood828277-suppl1.pdf]
